# Supplementary figures and images for: Genetic Investigation of Consanguineous Pakistani Families Segregating Rare Spinocerebellar Disorders
Source: MDPI journal article supplement (doi:10.3390/genes14071404), 2023-07-06

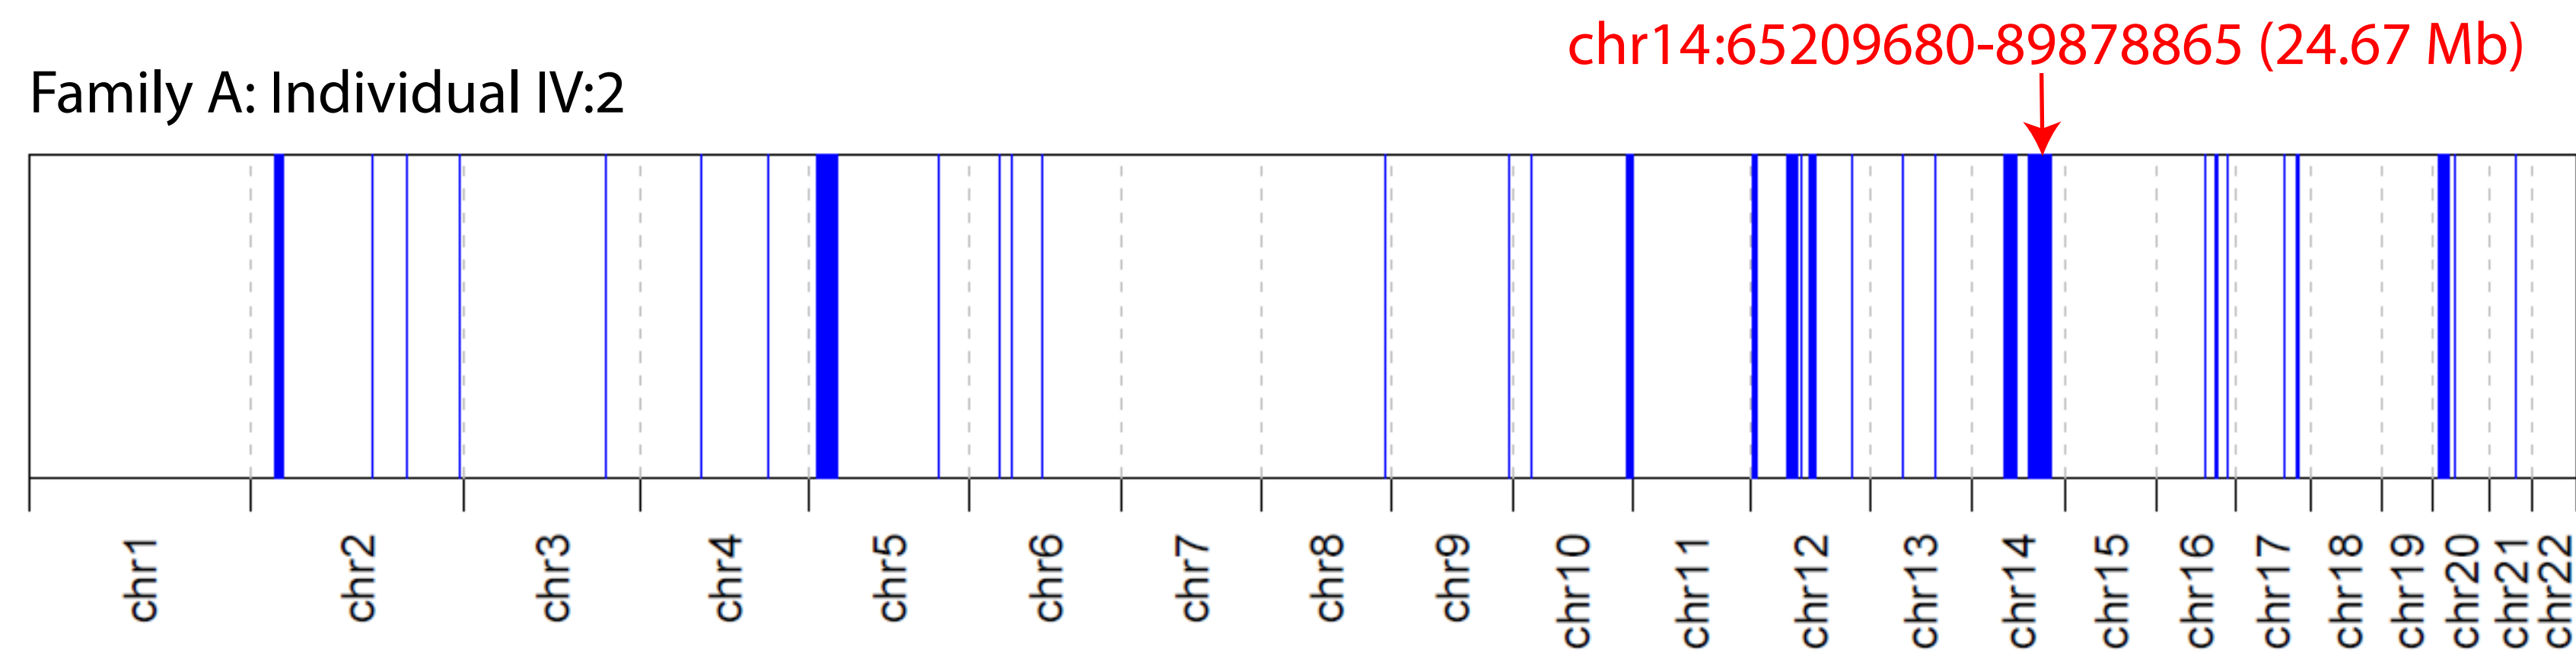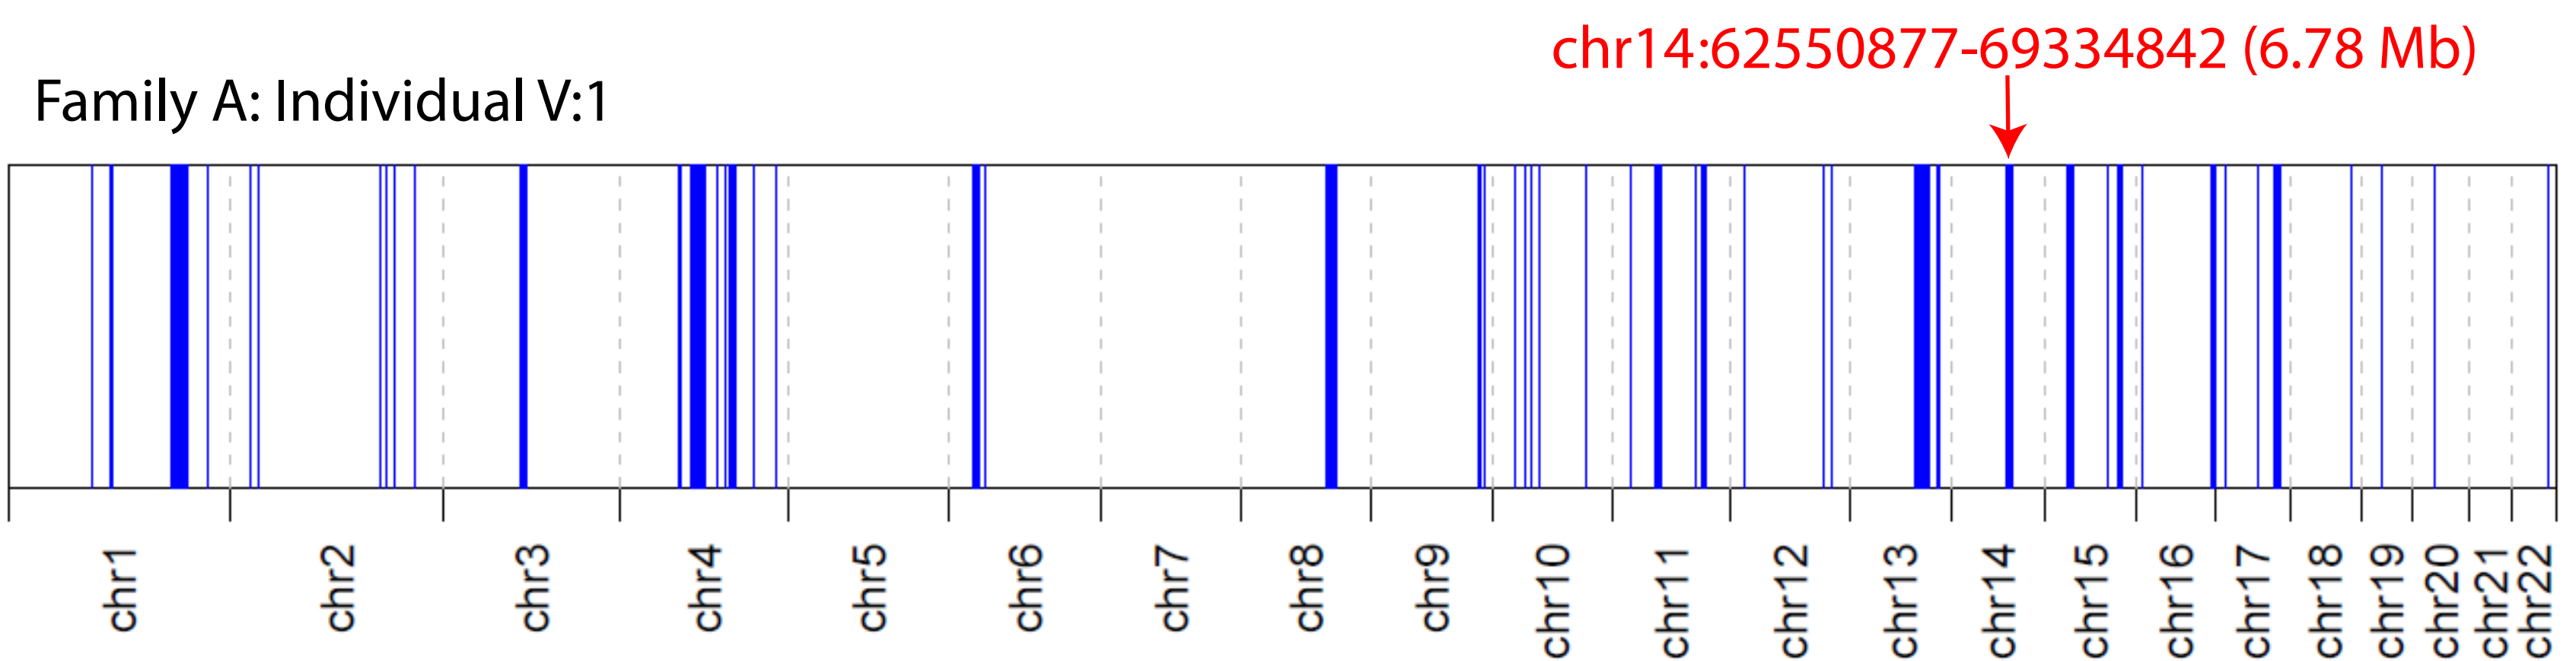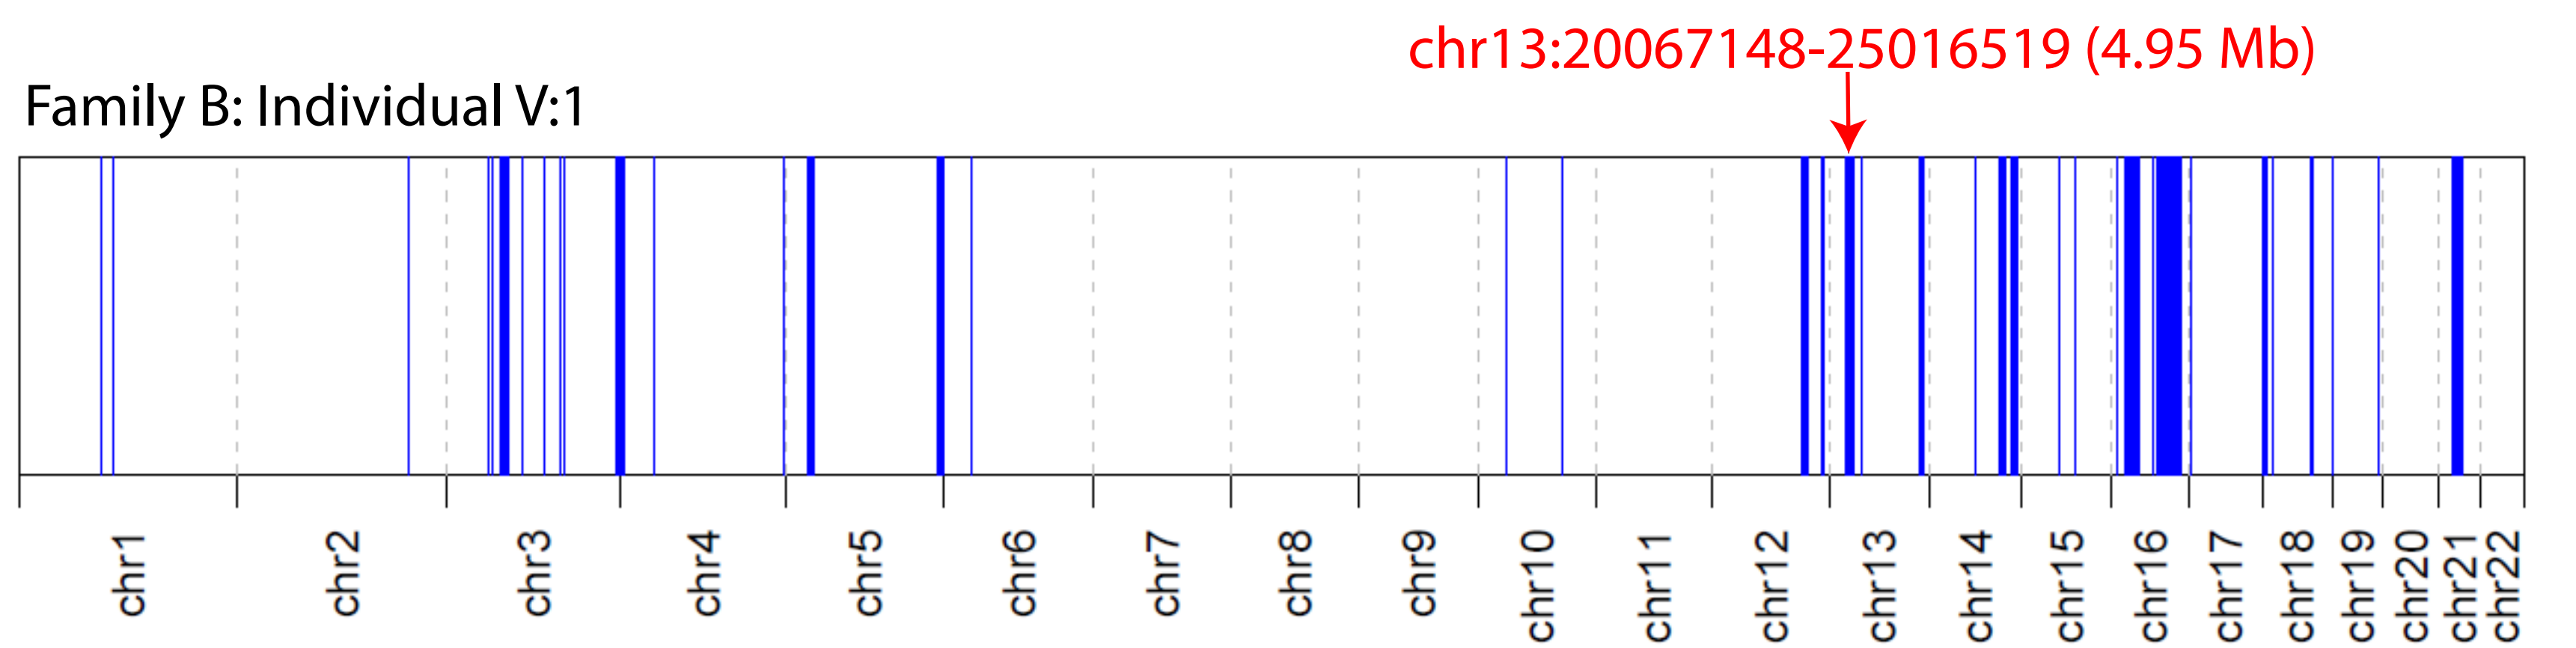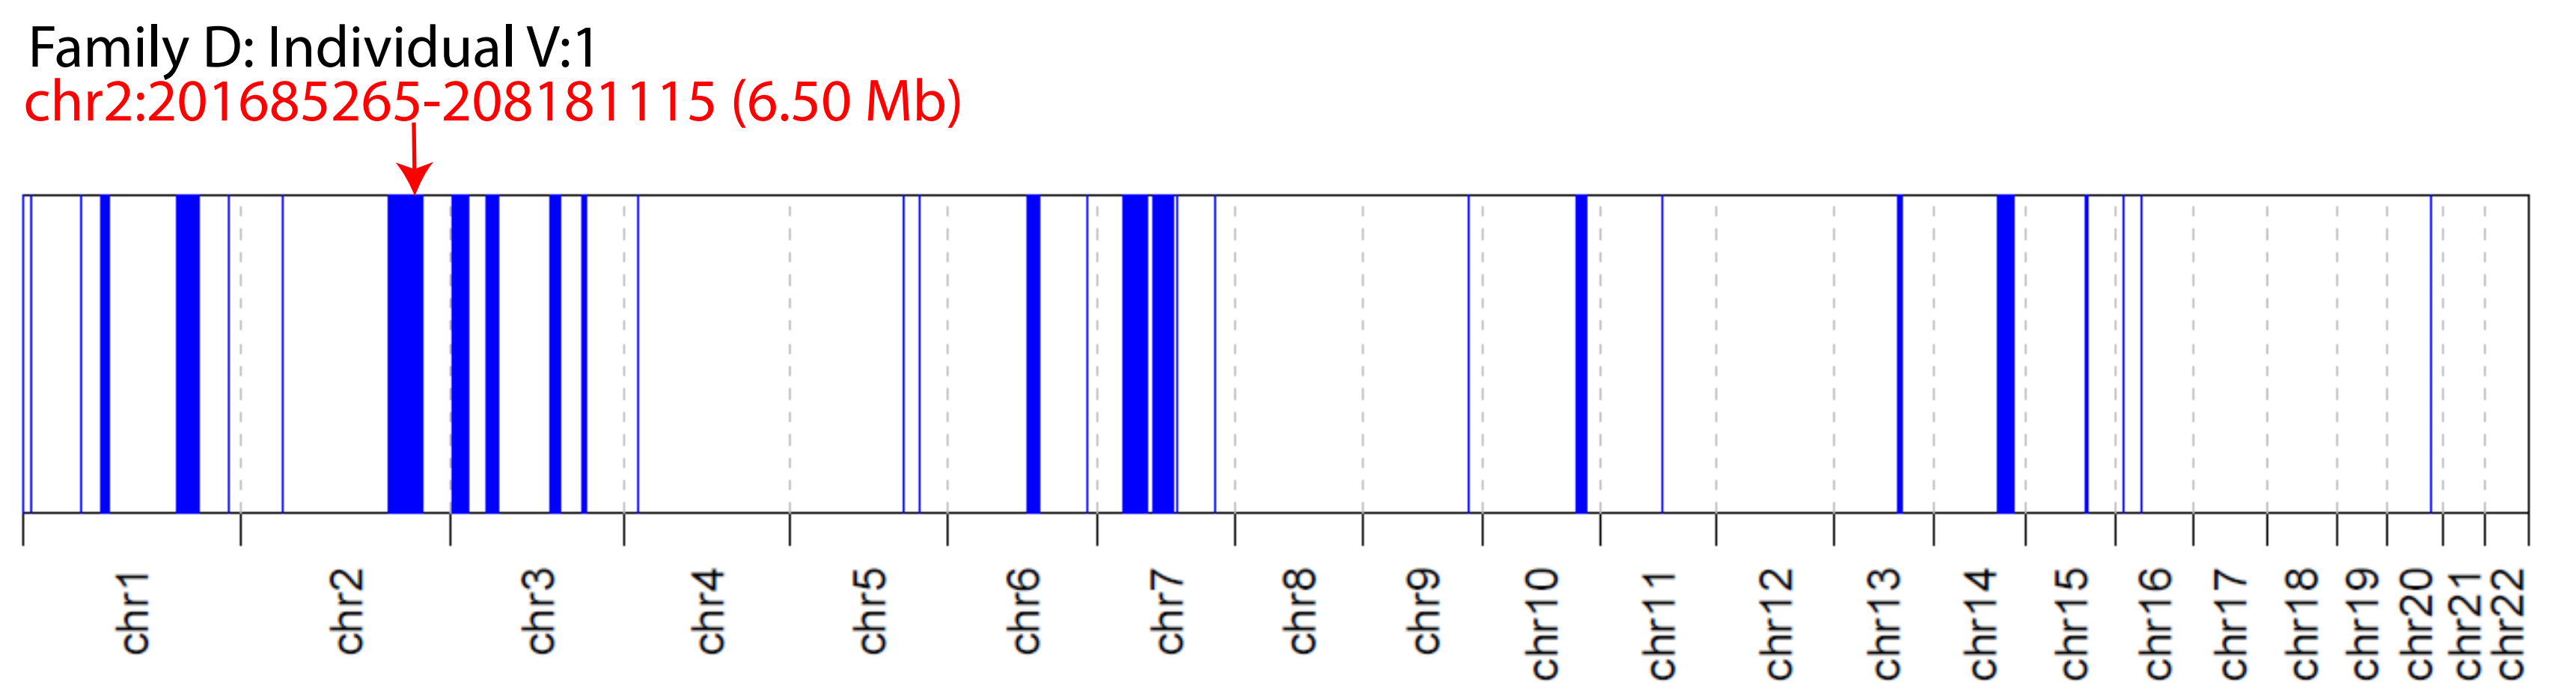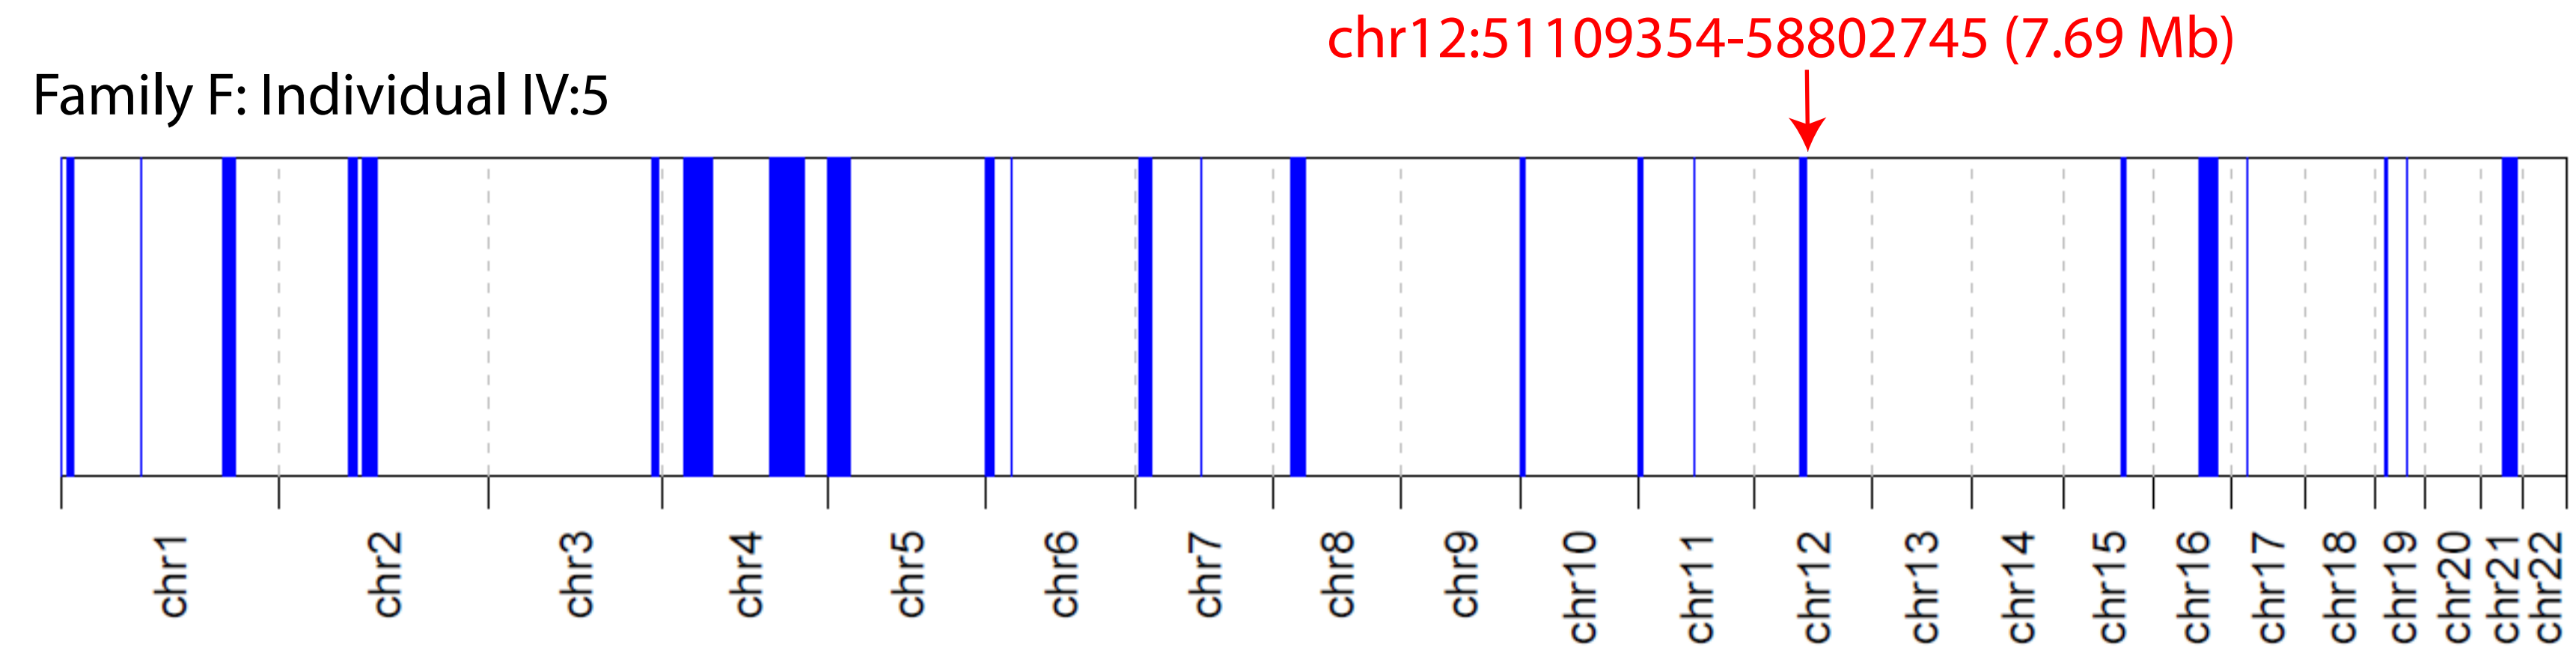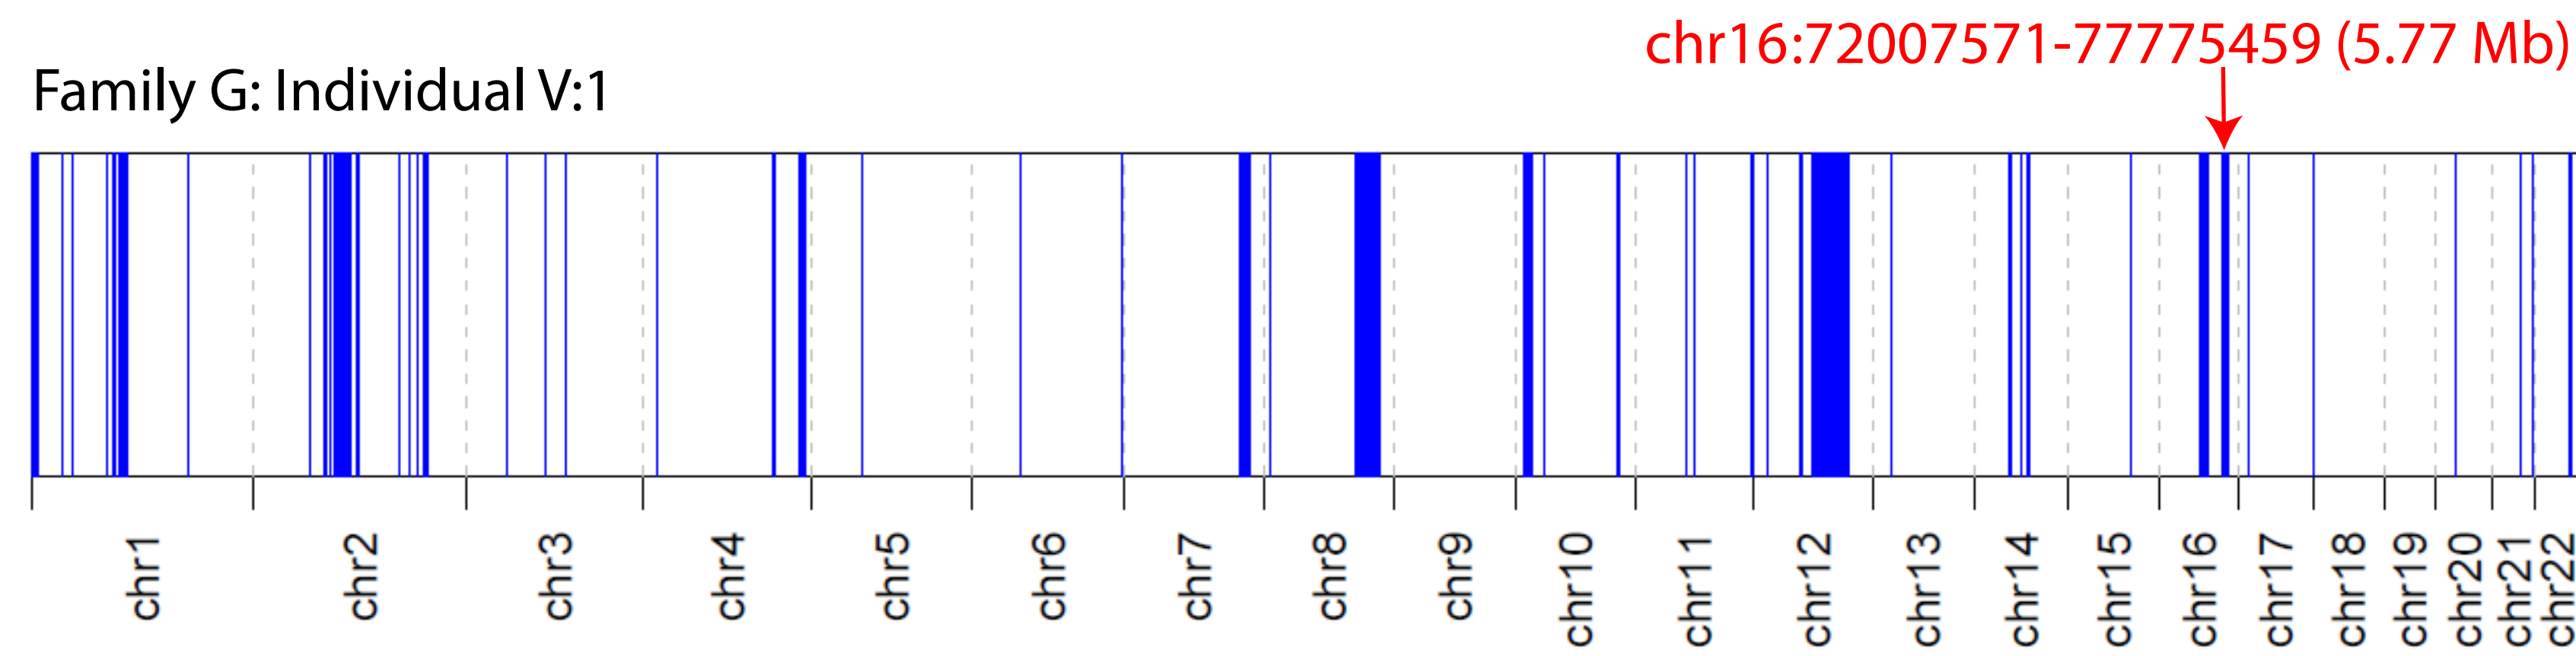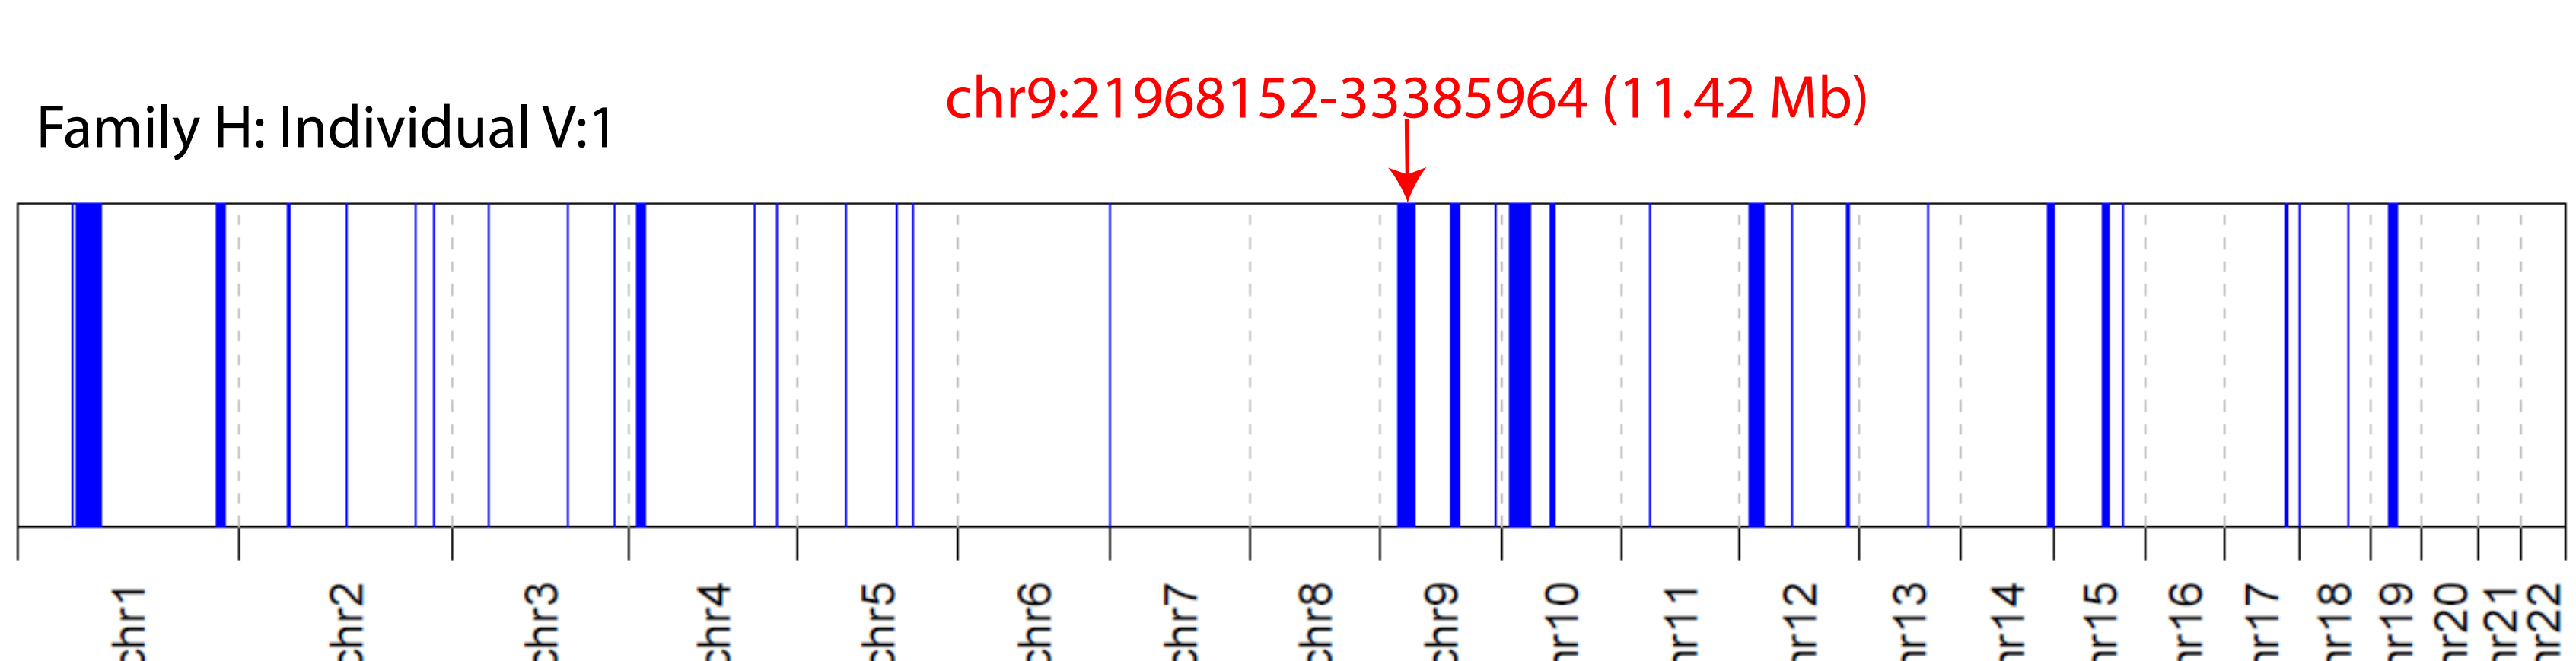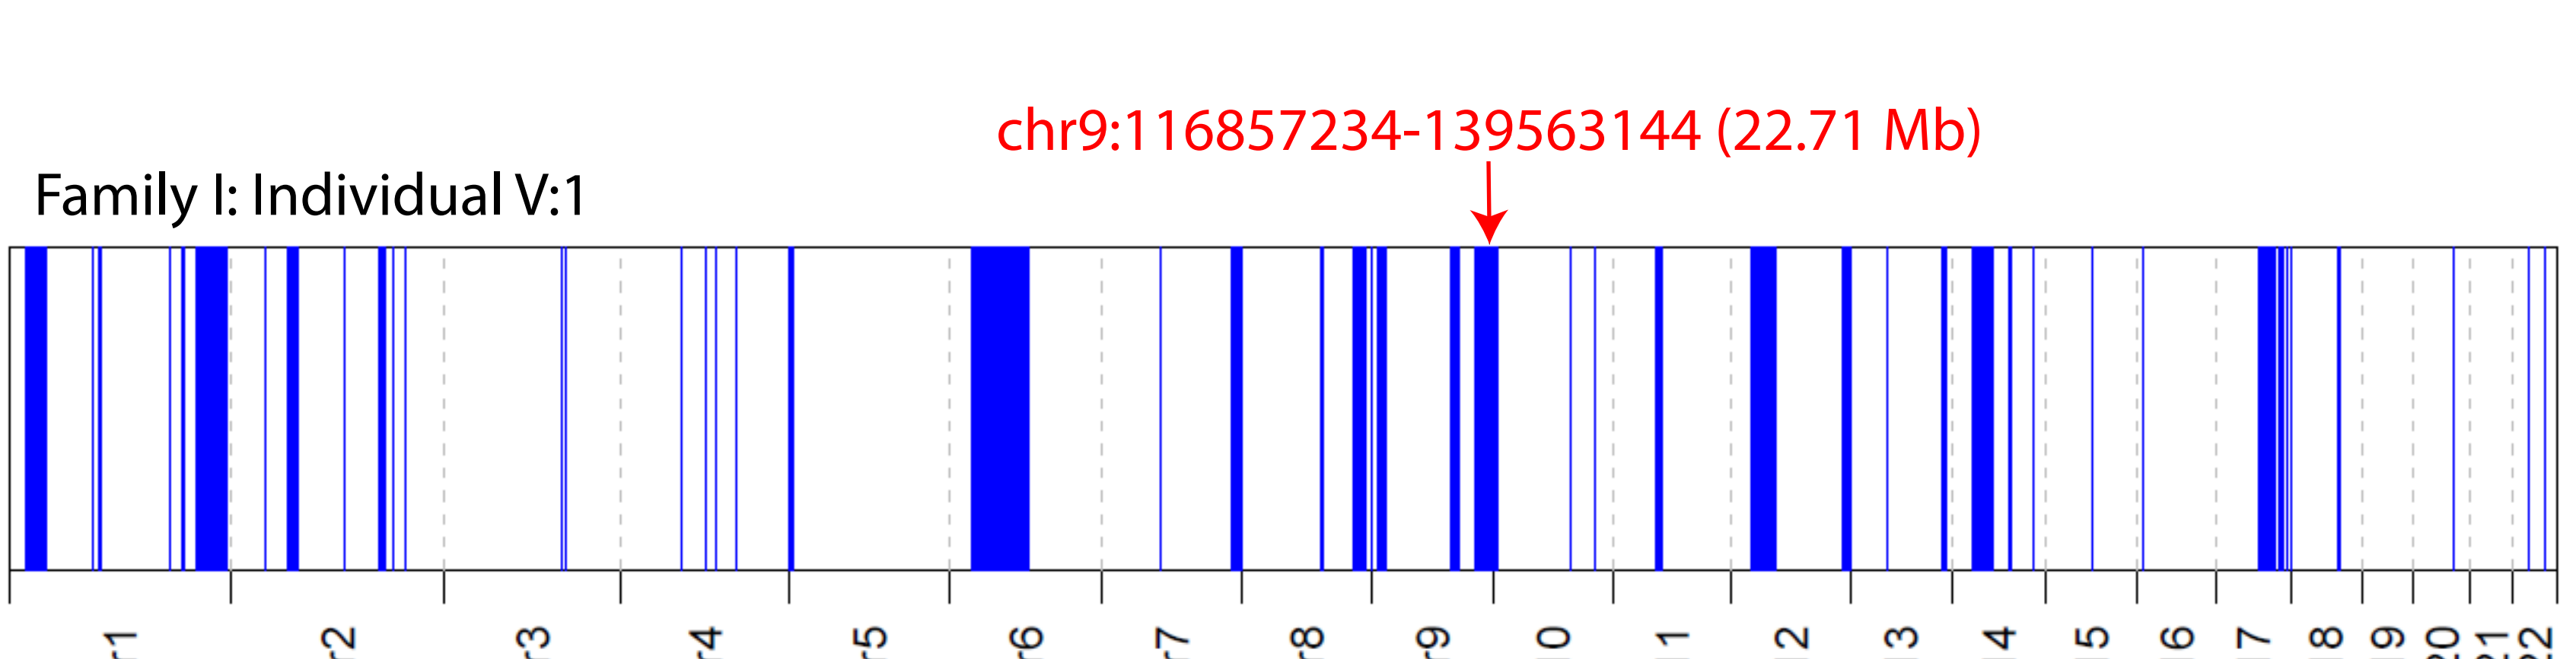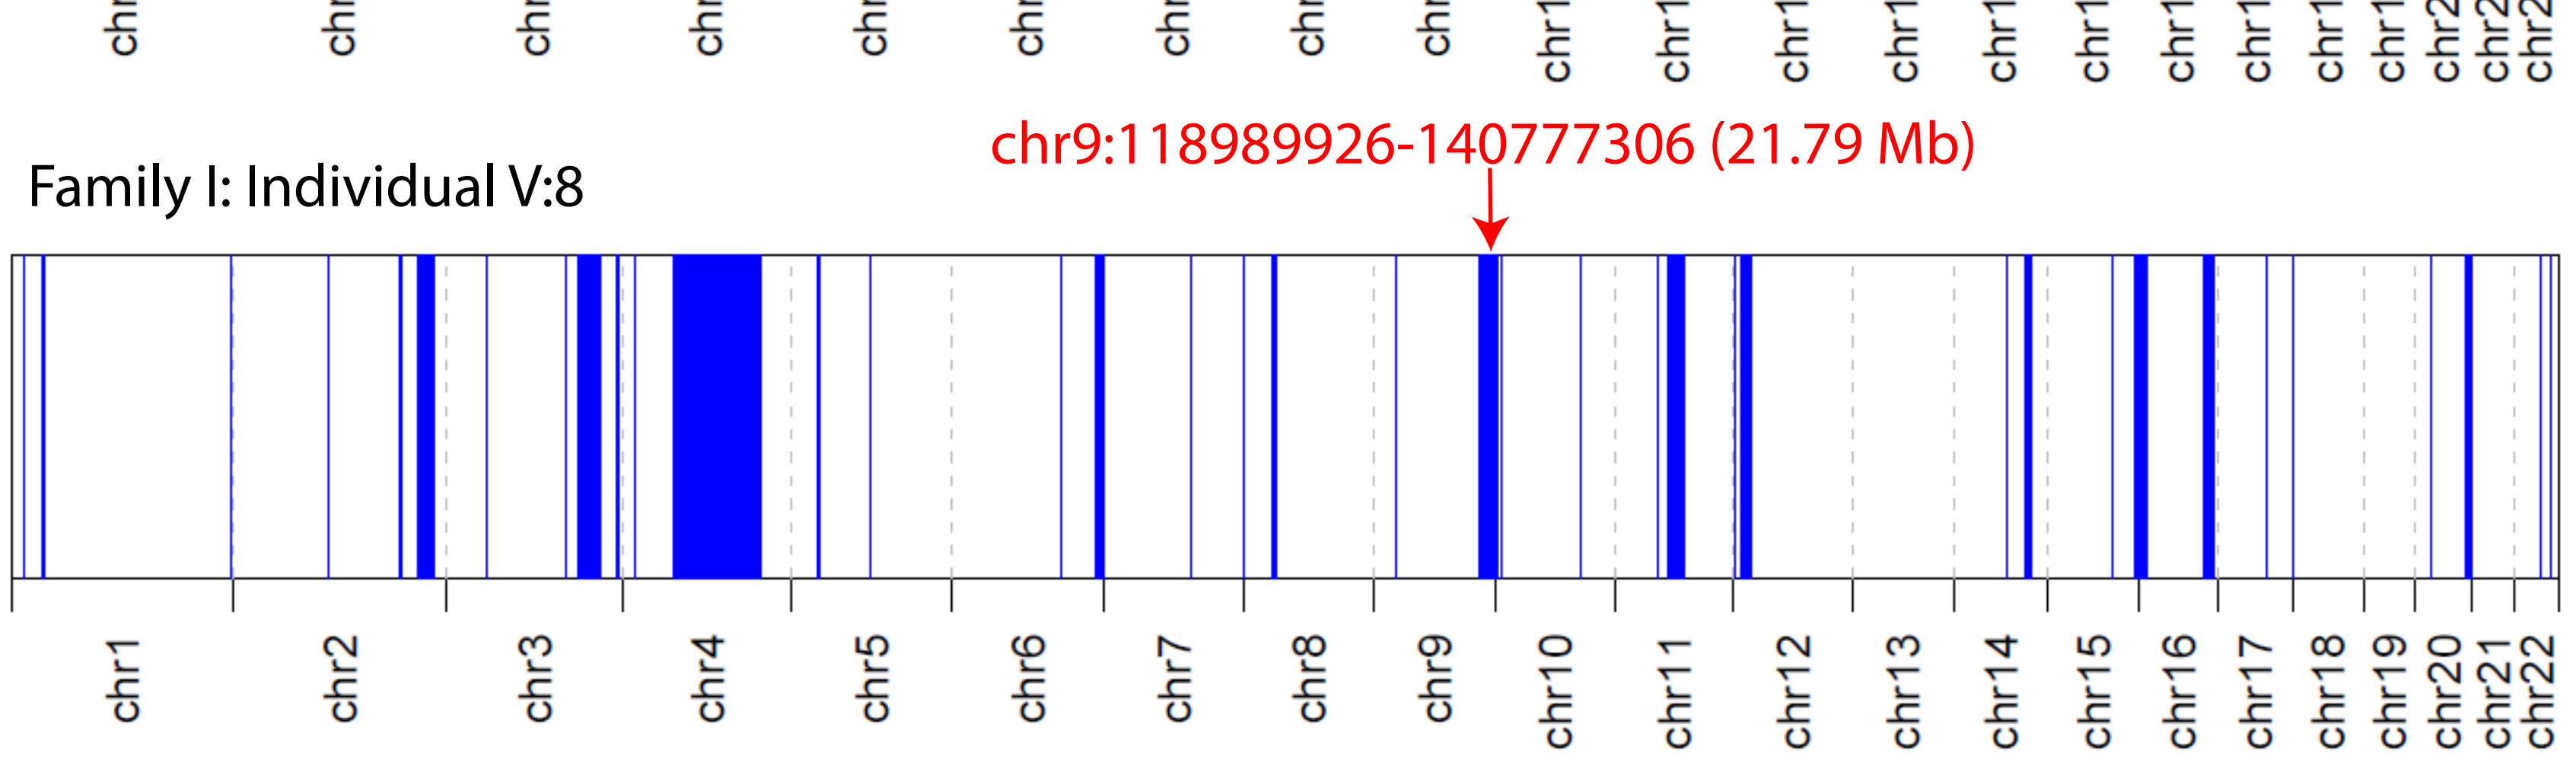

Supplement: s1 [file s1]

**A**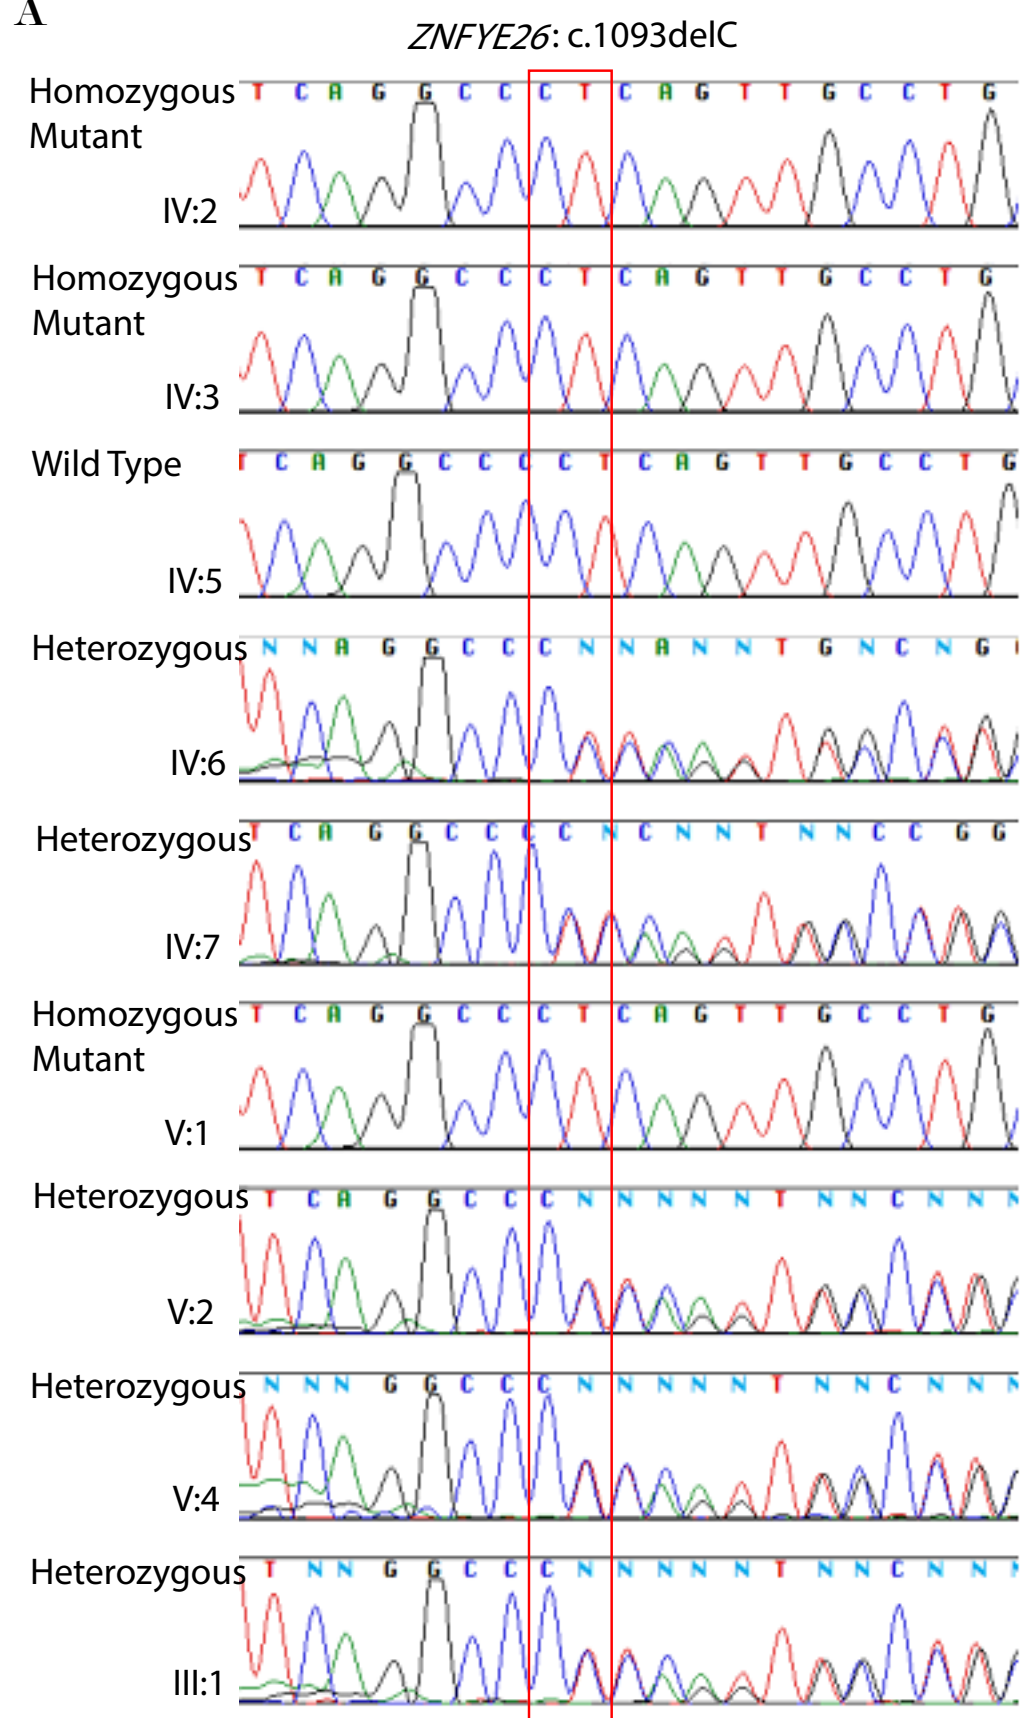**B**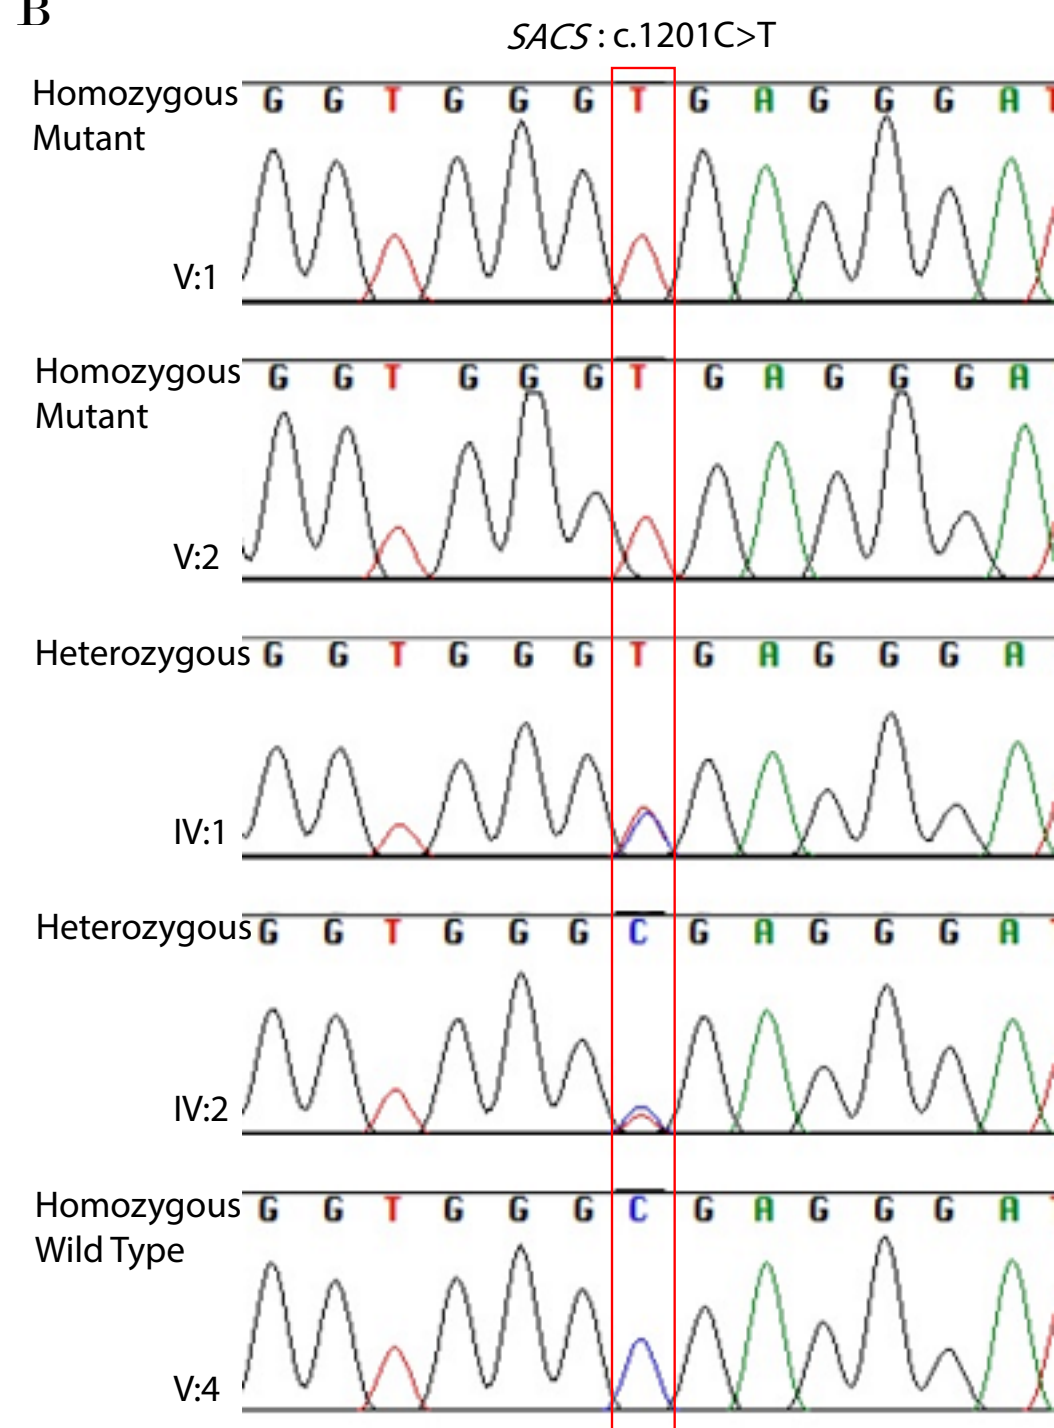**C**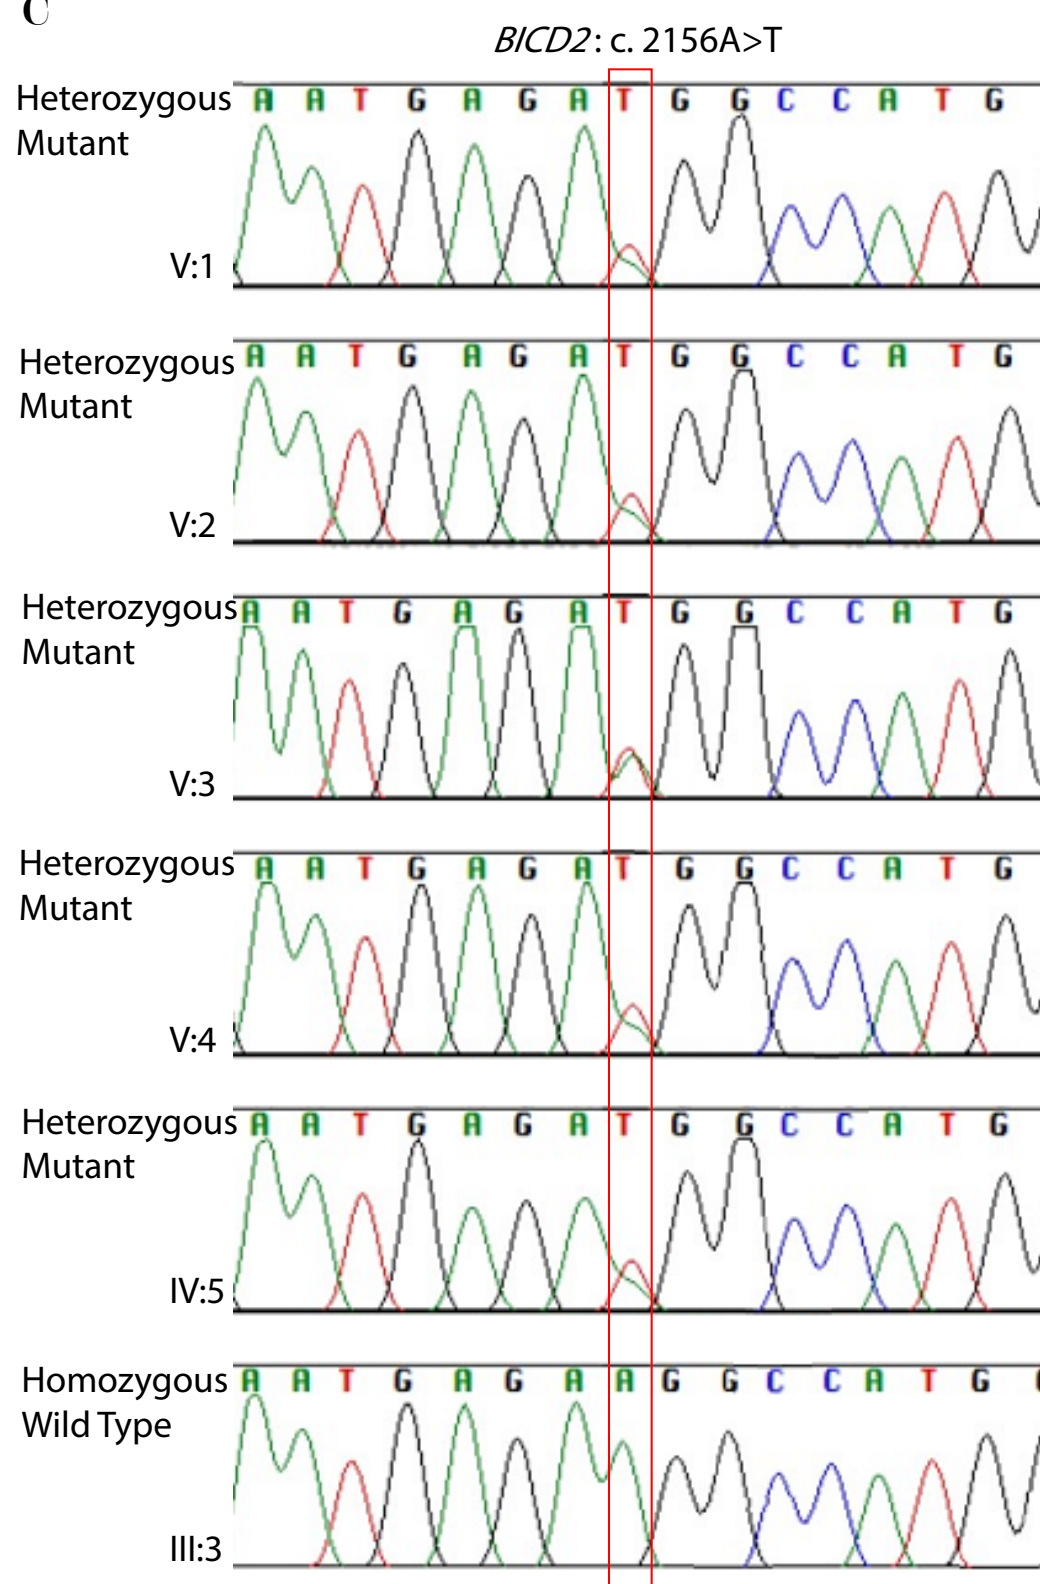**D**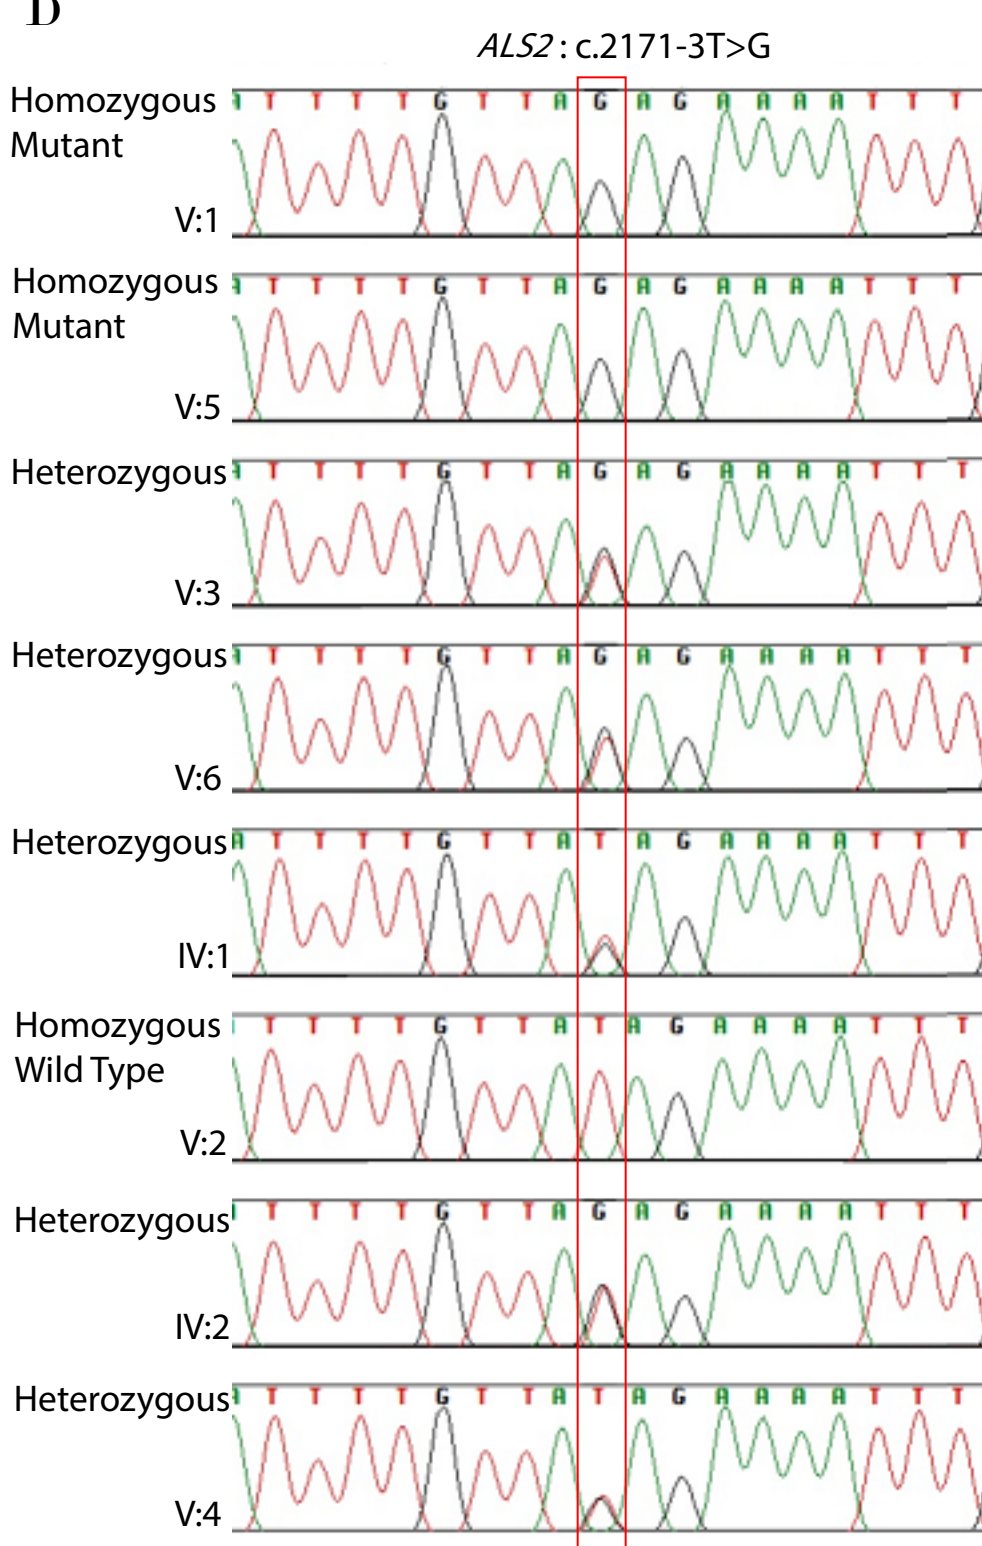**E**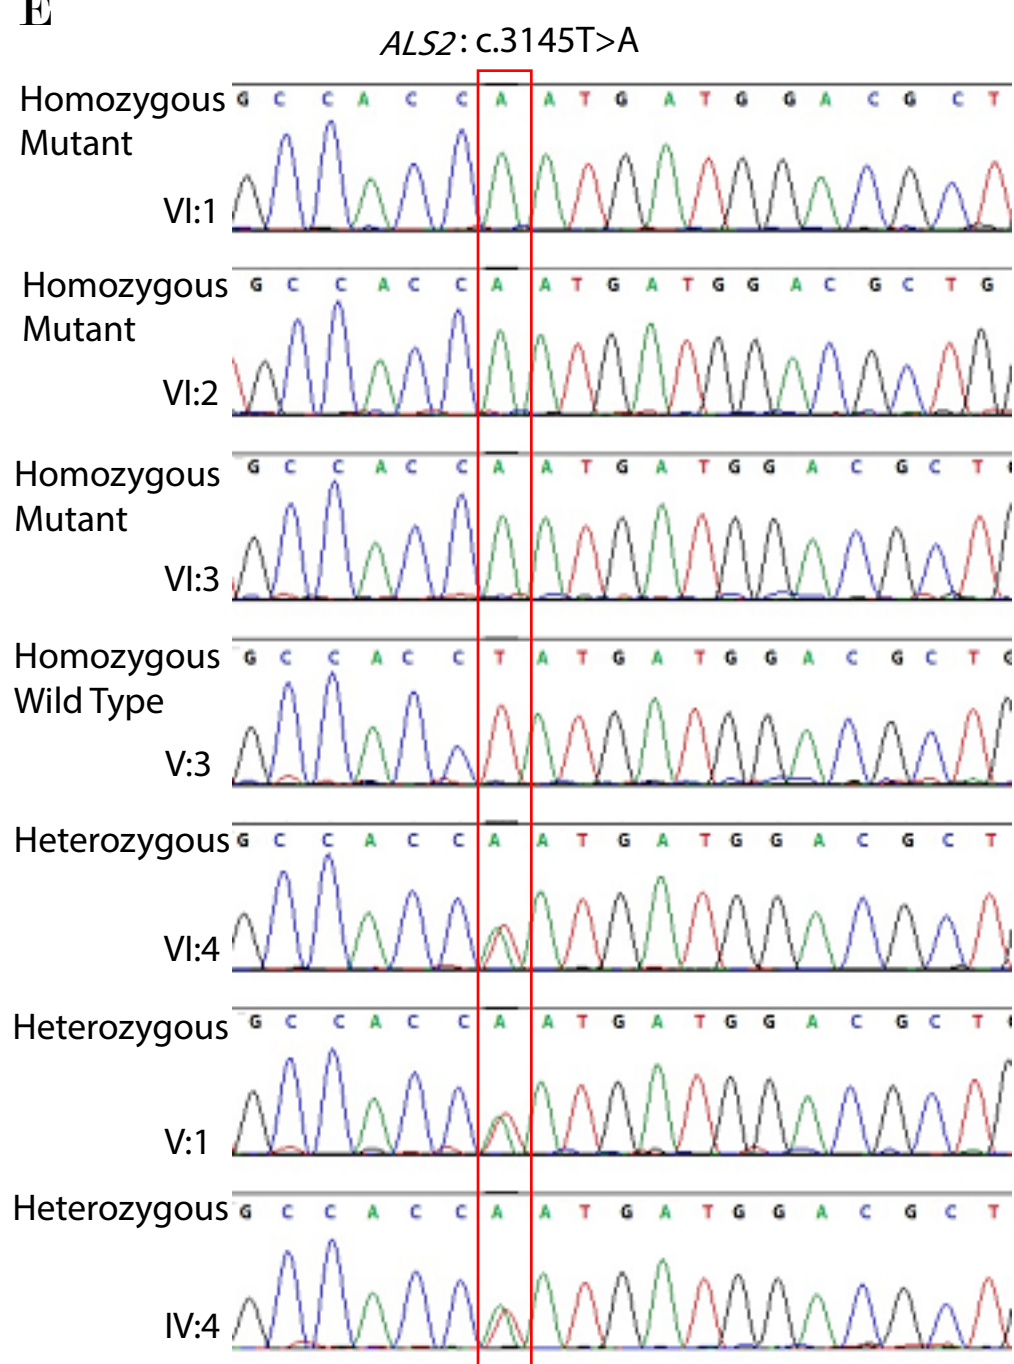**F**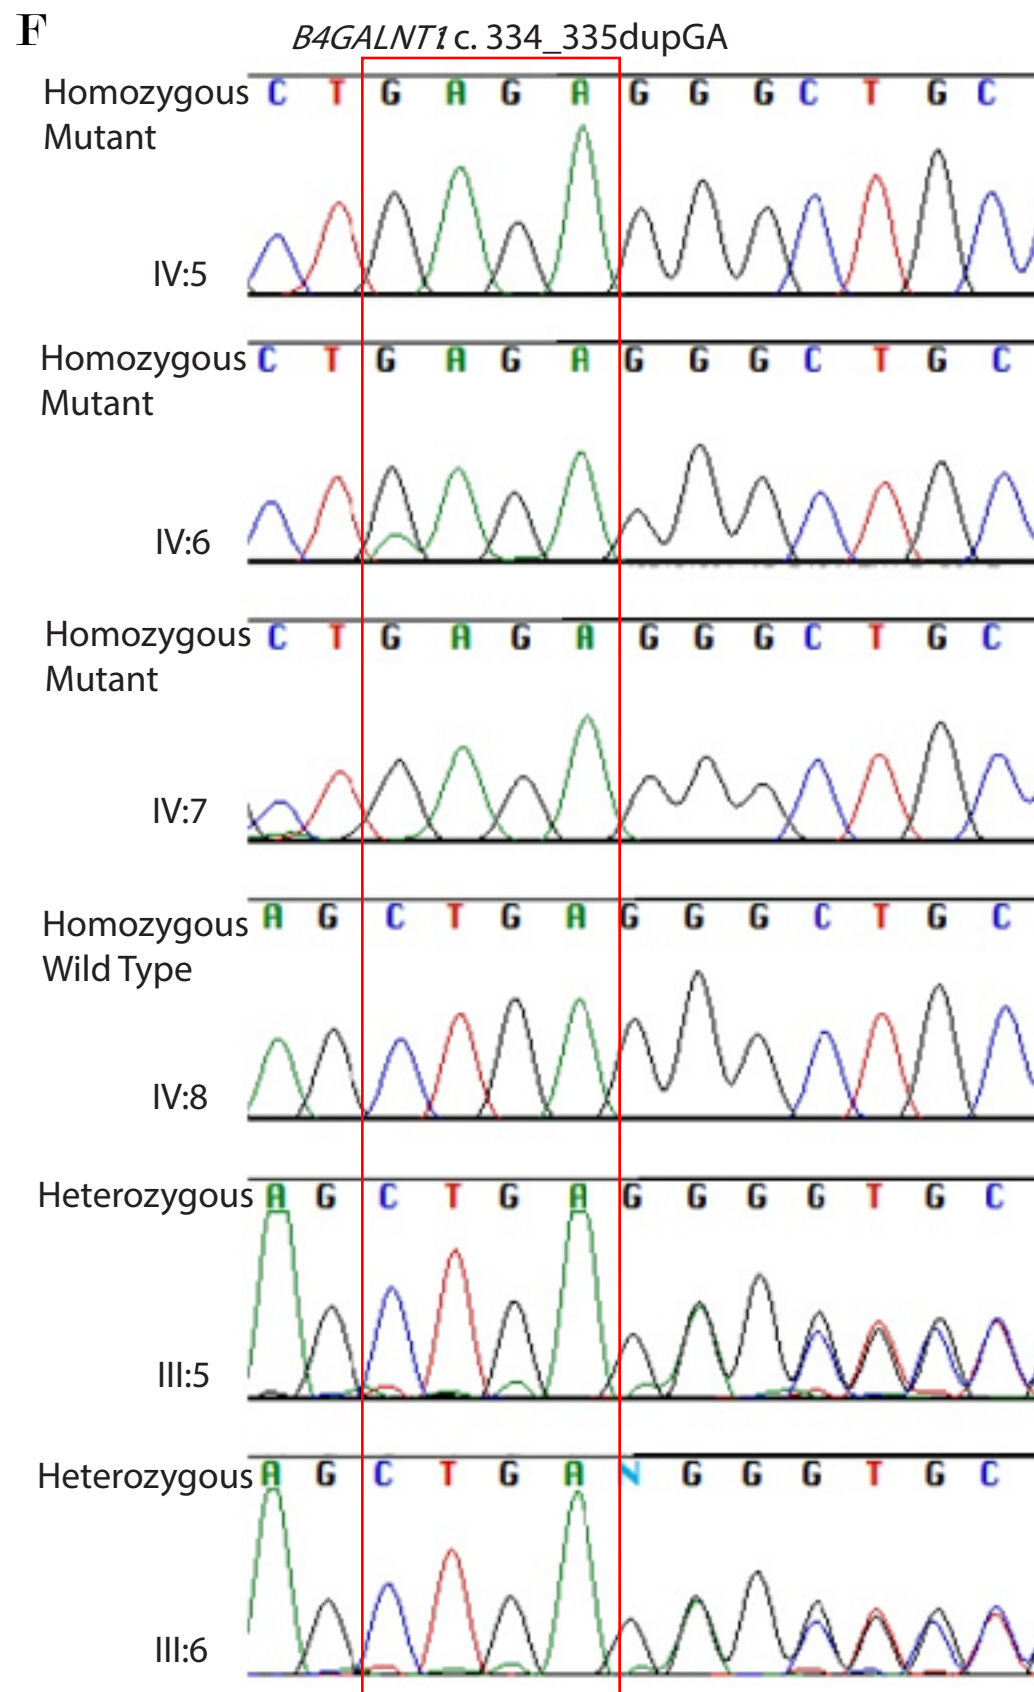**G**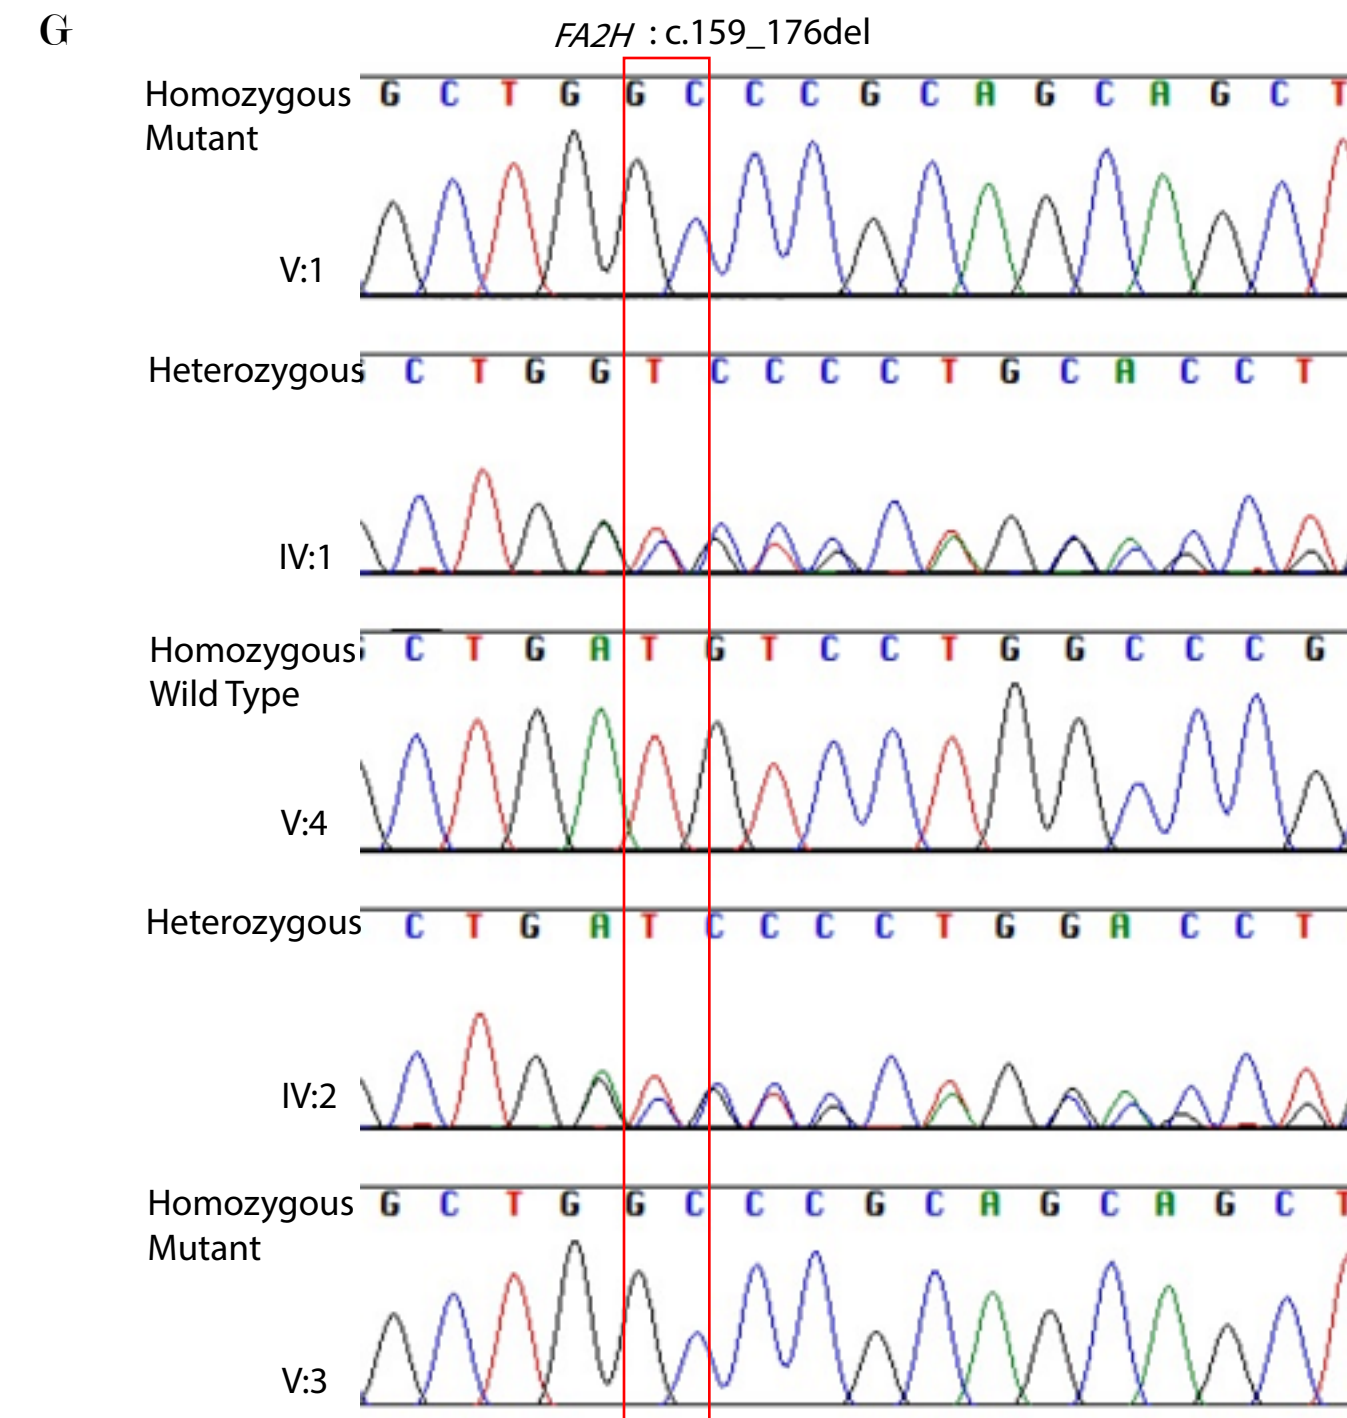**H**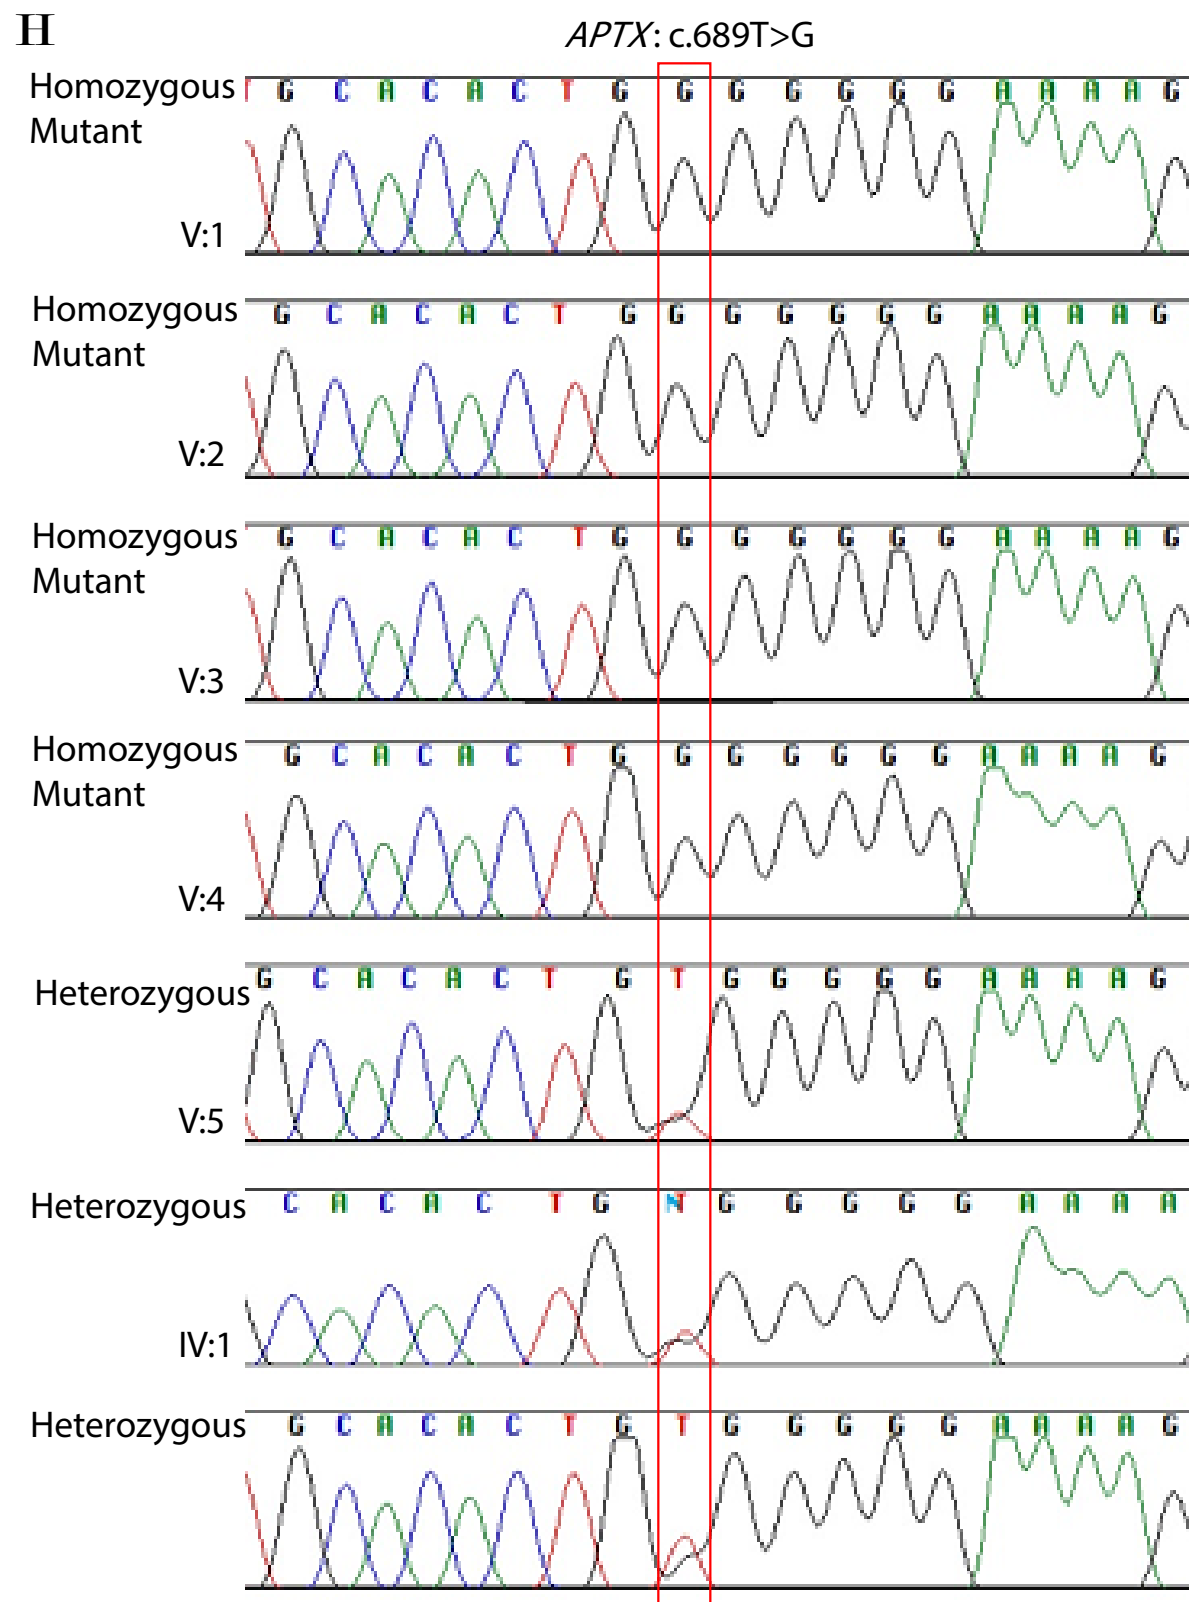**I**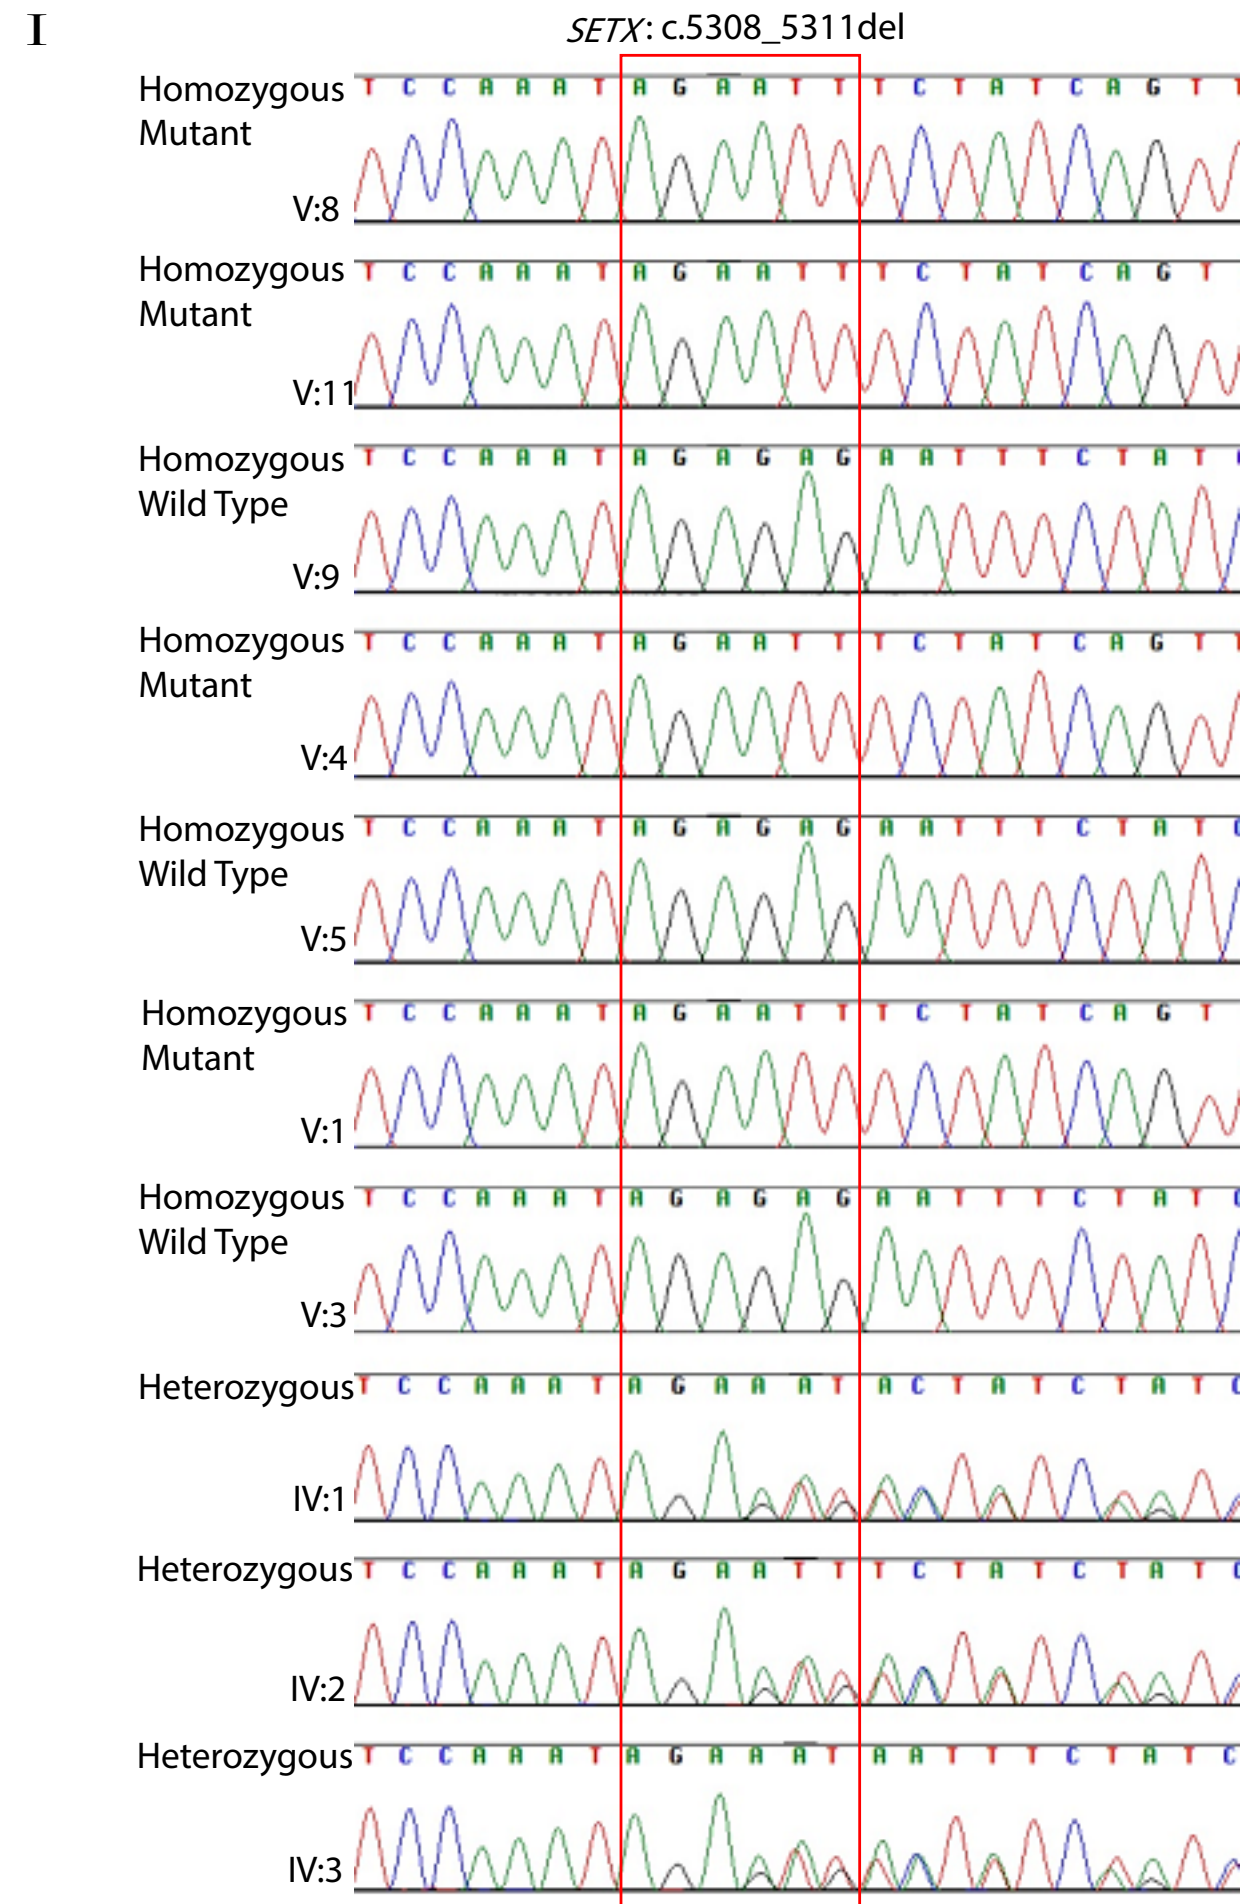

Supplement: s1 [file s1]
